# Supplementary material
Source: PubMed Central journal article supplement (PMC2836082)
Supplement: supp_M109.060095_jbc.M109.060095-1.pdf [file supp_M109.060095_jbc.M109.060095-1.pdf]

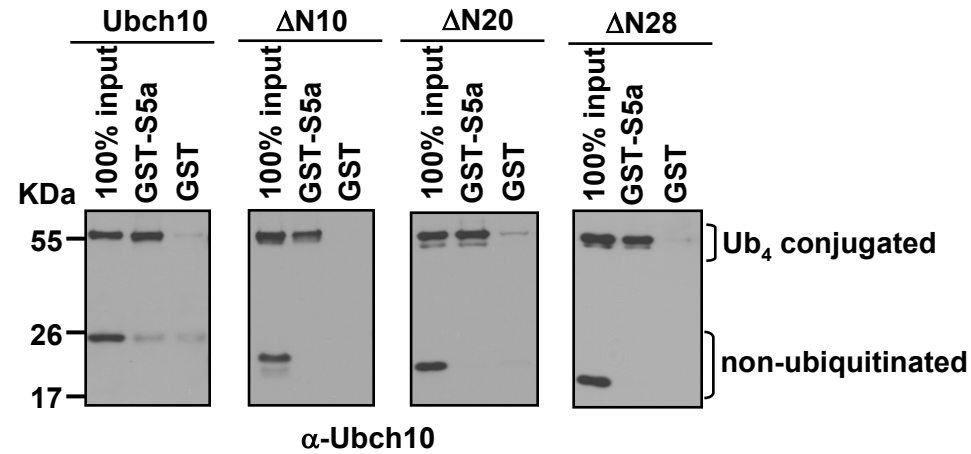

**Figure S1 K48 Ub<sub>4</sub>-conjugated Ubch10 or N-terminally truncated mutants (ΔN10-, ΔN20- and ΔN28-Ubch10) efficiently bind the S5a subunit of the 26S proteasome.**

60 pmol recombinant GST or GST-S5a was preincubated with 6 μL of glutathione Sepharose 4B beads for 2 hours at 4 °C with rotation in the binding buffer containing 20 mM Tris, pH 7.8, 50 mM NaCl, 2 mM DTT. After washing, the beads were resuspended in 50 μL of binding buffer supplemented with 0.2 mg/mL BSA and 300 nM Ub<sub>4</sub>-conjugated Ubch10 or Ubch10 mutants. The mixtures were rotated for 2 hours at room temperature and then washed by binding buffer supplemented with 0.1% NP-40. The bound proteins were eluted by mixing beads with 60 μL of 1.5X SDS sample buffer containing 3 M urea, separated by SDS-PAGE and evaluated by immunoblotting.

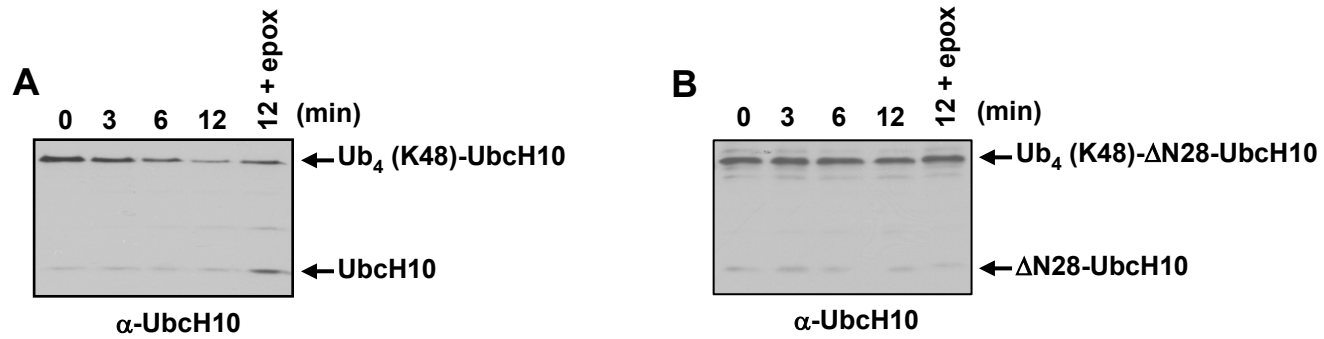

**Figure S2 Ub<sub>4</sub> (K48) targets C-terminally His<sub>6</sub>-tagged Ubch10, but not ΔN28-Ubch10, for 26S proteasomal degradation.**  
 C-terminally His<sub>6</sub>-tagged Ubch10 or ΔN28-Ubch10 was used for *in vitro* ubiquitination reaction. Degradation assays were analogous to Fig. 2C.

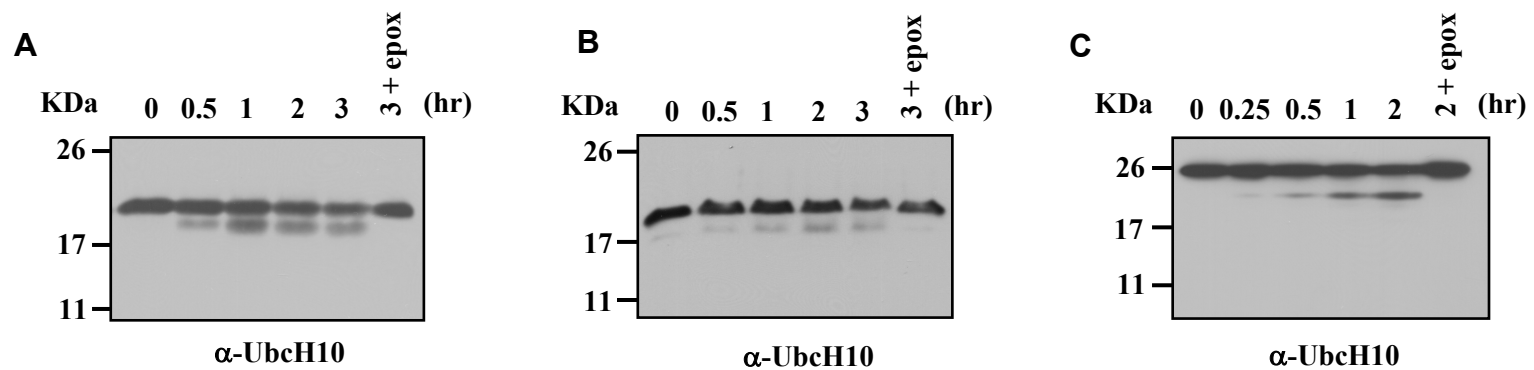

**Figure S3 The unstructured N-terminal His<sub>6</sub> tag or the PEST domain of ODC can initiate partial degradation of  $\Delta$ N28-UbcH10.** Degradation of 200 nM His<sub>6</sub>- $\Delta$ N28-UbcH10-His<sub>6</sub> (A),  $\Delta$ N10-UbcH10<sub>24</sub> (B) or PEST- $\Delta$ N28-UbcH10-His<sub>6</sub> (C) by 13.5 nM doubly-capped 26S proteasome was evaluated by immunoblotting.

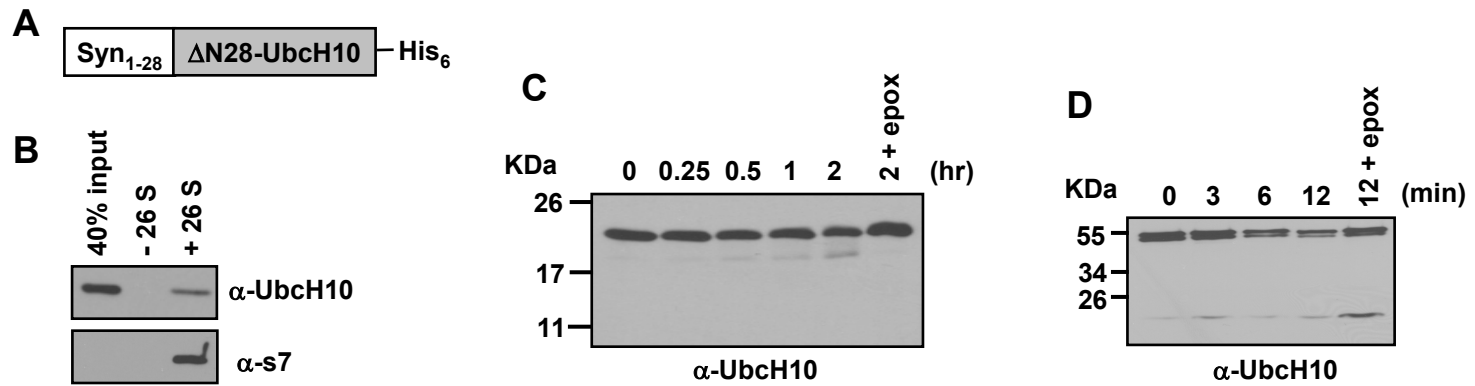

**Figure S4 The unstructured N-terminal region of alpha-synuclein promotes Ub-dependent  $\Delta$ N28-UbcH10 degradation.**

(A) Schematic representation of the construct with the N-terminal 28 amino acids of alpha-synuclein (Syn) fused at the N-terminus of  $\Delta$ N28-UbcH10.

(B) Syn<sub>1-28</sub>- $\Delta$ N28-UbcH10 binds the 26 S proteasome. The binding assay was performed by using the Bio-Spin 30 spin column as described in the Experimental Procedures.

(C) The unstructured Syn<sub>1-28</sub> region in Syn<sub>1-28</sub>- $\Delta$ N28-UbcH10 can be slowly cleaved by the 26S proteasome. Degradation assays were analogous to Fig. 1E and Fig. S3.

(D) The Syn<sub>1-28</sub> region promotes Ub-dependent degradation of  $\Delta$ N28-UbcH10. Degradation assays were analogous to Fig. 2C.
